# Supplementary material
Source: PubMed Central journal article supplement (PMC6279570)

Supp Fig

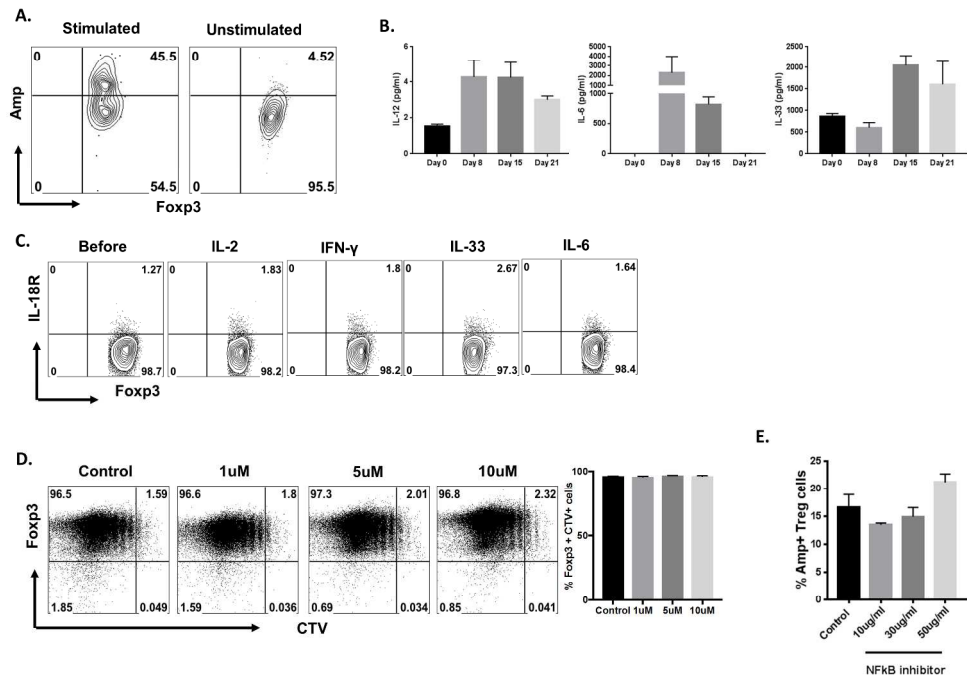

254x190mm (300 x 300 DPI)

Supplement: NIHMS975795-supplement-supplement_1.pdf [file NIHMS975795-supplement-supplement_1.pdf]
